1 **Rat ultrasonic vocalizations and novelty-induced social and non-social investigation**  
2 **behavior in a seminatural environment**

3

4 Indrek Heinla<sup>1</sup>, Xi Chu<sup>2</sup>, Anders Ågmo<sup>1</sup>, Eelke Snoeren<sup>1</sup>

5 <sup>1</sup> Department of Psychology, UiT The Arctic University of Norway, Norway

6 <sup>2</sup> Department of Psychology, Norwegian University of Science and Technology, Norway

7

8

9

10

11

12

13

14

15

16

17

18

19

20 Corresponding author: Eelke M.S. Snoeren

21 Current address: Department of Psychology, UiT the Arctic University of Norway, 9037  
22 Tromsø, Norway

23 E-mail: eelke.snoeren@uit.no

24 **Abstract**

25           Although rats are known to emit ultrasonic vocalizations (USVs), it remains unclear  
26 whether these calls serve an auditory communication purpose. For USVs to be part of  
27 communication, the vocal signals will need to be a transfer of information between two or  
28 more conspecifics, and with the possibility to induce changes in the behavior of the recipient.  
29 Therefore, the aim of our study was to investigate the role of USVs in rats' social and non-  
30 social investigation strategies when introduced into a large novel environment with unfamiliar  
31 conspecifics. We quantified a wide range of social and non-social behaviors in the  
32 seminatural environment, which could be affected by subtle signals, including USVs. We  
33 found that during the first hour in the seminatural environment the ability to vocalize did not  
34 affect how quickly rats met each other, their overall social investigation behavior, their  
35 passive social behavior nor their aggressive behavior. Furthermore, the non-social exploratory  
36 behaviors and behaviors reflecting anxiety/stress-like states were also unaffected. These  
37 results demonstrated that a disability to vocalize did not result in significant disadvantages (or  
38 changes) compared to intact conspecifics regarding social and non-social behaviors. This  
39 suggests that other (multi)sensory cues are more relevant in social interactions than USVs.

40

41

42

43

44

45

46

47

48 **Keywords:** Rat, Ultrasonic vocalization, Social, Behavior, Seminatural environment

49

50 **Highlights**

- 51 - Devocalization had no effect on social interactions with unfamiliar conspecifics
- 52 - Ability to vocalize does not change the quality or quantity of social behaviors
- 53 - Devocalization had no effect on non-social behaviors in a novel environment
- 54 - USVs did not play a communicative role in social behaviors
- 55 - USVs did not play a role in non-social behaviors

56

57

## 58 **Introduction**

59 Many animals communicate through vocalization, and the understanding of how and  
60 why animals communicate has long been fascinating to scientists [1]. Information encoded by  
61 vocal cues has diverse behavioral significance depending on the species. They can, for  
62 instance, serve a role in mating rituals, act as warning calls, convey location of food sources,  
63 or play a role in influencing the behavior of an interacting partner (reviewed in [2]). The fact  
64 that rats can produce vocal signals as audible squeals in the range of 2-4 kHz and ultrasonic  
65 vocalizations (USVs, up to ~80 kHz) has been known for a long time [3]. However,  
66 researchers are still attempting to understand the structure and function of these calls.

67 Adult rats emit two main types of ultrasonic vocalizations: the low 22 kHz and the  
68 high 50 kHz calls. The 22 kHz calls are assumed to function as alarm calls, since they have  
69 been observed mostly in aversive situations/contexts (reviewed in [4]). The 50 kHz calls  
70 (ranging between 30-80 kHz), on the other hand, reflecting appetitive calls, are emitted in the  
71 presence of a sexual partner and during copulation [5-7], or after administration of hedonic  
72 drugs [8, 9].

73 Although USVs are reported to be emitted before, during, and/or after certain events,  
74 the exact function of these vocalizations to the relevant event is not self-explanatory. Many  
75 researchers have proposed that the USVs serve a communicative role, but in order for the  
76 vocalizations to be part of *communication*, the vocal signals will need to be a transfer of  
77 information between two or more conspecifics, and with the possibility to induce changes in  
78 the behavior of the recipient. So far, the empirical evidence remains inconclusive on whether  
79 USVs play a communicative role. Evidence pointing in the direction of a communicative  
80 function are mainly showing that playback of pre-recorded 50 kHz calls induces transient  
81 approach behavior in rats, especially juveniles [10-13]. On the other hand, we have  
82 demonstrated that the playback of vocalizations from a conspecific of the opposite sex does

83 *not* induce approach behavior in male nor female adult rats [14, 15]. In addition, it was found  
84 that when the emission or receiving of the USVs is disrupted (e.g. by devocalization or  
85 deafening), rats hardly elicit different patterns of behavior in their partners [16-19]. Only in  
86 juvenile rats, different patterns of play behavior have been found in dyads of silent versus  
87 vocalizing rats [20].

88         In addition, Gregarious mammals constantly interact with their conspecifics, using  
89 different means of communication. Their social behavior consists of more different categories  
90 of behaviors that is much more complex than the approach or play behaviors mentioned  
91 above. In a broad sense, social behaviors can be defined as any modality of communication  
92 and/or interaction between conspecifics of a given species (see review [21]). Social behavior  
93 displayed at the inappropriate time or place or of inappropriate intensity can lead  
94 disadvantages to the individuals even to a social group as a whole. These interactions involve  
95 active detection and response to cues from multiple sensory modalities, and a continuous  
96 exchange of social information perceived from sensory cues produces an important feedback  
97 loop that could change the behavioral responses again. Since the complexity of interactions  
98 depends on the potential communication space between individuals, social behaviors are  
99 among the most complex behaviors. Unlike some other communication modalities, USV  
100 communication has strong directivity, low energy consumption, thus they can be effective  
101 over a wide range of distances [22], which makes USVs an interesting candidate for a  
102 communicative function in social behavior in rats.

103         Surprisingly, studies on the role of USVs in social interaction in rats are rare, and the  
104 studies that are performed (mainly studying play behavior in juveniles) make use of  
105 traditional test settings in which rats are placed in a small arena without the opportunity to  
106 express their full repertoire of behavior or interact with multiple conspecifics [20, 23, 24]. As  
107 it has been suggested that USVs are used as social-locational cues (providing information

108 about the other conspecifics nearby and their whereabouts) [25], a relevant point of criticism  
109 is then that if USVs play a communicative role in social behavior, more space would be  
110 required than is available in traditional set-ups, for these cues to have any significance.

111         Though, previously we have reported that silencing rats with devocalization  
112 procedures did not significantly affect sexual behavior or social interactions, via sniffing  
113 behavior, in rat tested in a seminatural environment [17]. As sexual behavior is probably one  
114 of the most relevant behavior in which social-locational cues should play a major role, this  
115 suggests that USVs do not play an essential role in social interaction. However, the rats in this  
116 study were already living the environment for 7 days and were therefore already familiar with  
117 each other at the moment of testing. It is hypothetically possible that the rats had already  
118 adapted to the communication limitations and modified their interaction behaviors. In  
119 addition, individuals with disabled social and communication abilities could perform  
120 normally in some situations, whereas, when posed with novel situations, they might  
121 experience higher levels of stress and need longer time to adjust to the circumstances. In  
122 combination with the idea that appropriate communication and social interaction is probably  
123 most important upon first encounter, it would be interesting to look at the role of USVs when  
124 rats are introduced to a novel seminatural environment with unfamiliar conspecifics.

125         Therefore, the aim of our study was to investigate the role of USVs in rats' social and  
126 non-social investigation strategies when introduced into a novel large environment with  
127 unfamiliar conspecifics. We quantified a wide range of social and non-social behaviors in the  
128 seminatural environment, which could be affected by subtle signals, including USVs. As  
129 tracking of the individual's USVs within a group of rats comes with its own challenges,  
130 especially in a large arena, our current study used devocalized and sham-operated vocalizing  
131 male and female rats. Another advantage of this approach is that we were able to investigate a  
132 batch in which some rats were completely silent. If the emission of USVs plays a role in

133 social investigation behavior, our test conditions should be ideal to detect differences in  
134 behavior. Based on our previous findings, we expected that devocalized rats would overall  
135 show similar social investigation patterns as sham-operated vocalizing controls in our  
136 naturalistic set-up. However, at the same time, we expected that *if* USVs are indeed used as  
137 means of communication, it would be most visible during the first encounters with unfamiliar  
138 rats. Devocalized rats should then for instance be approached less by others than vocalizing  
139 rats.  
140

141 **Methods**

142           The data was collected from video recordings obtained in a previously performed  
143 experiment, resulting in the same materials and methods described previously [17]. The  
144 differences between the current and previous study are the behavioral scoring scheme that  
145 were used and timing of the observations. In the previous study, the role of USVs in sexual  
146 behavior were investigated, while the current study focuses on the role of USVs in other  
147 social and non-social behaviors. In addition, in the current study we analyzed the behavior  
148 during the first hour after introduction into the seminatural environment when the  
149 environment and conspecifics are still novel, whereas the previous study investigated the  
150 behaviors on day 7, after they had been familiarized to the new environment.

151

152 *Animals*

153           A total of 16 female and 12 male Wistar rats (250–300g upon arrival) were obtained  
154 from Charles River (Sulzfeld, Germany). Before testing, the animals were housed in same-sex  
155 pairs in Macrolon IV open cages (so all the animals were used to hearing vocalizations in the  
156 animal room) with tap water and commercial rat pellets available *ad libitum*. All rats had  
157 obtained one sexual experience in a copulation test prior to the experiment [17, 26]. The  
158 experiment was conducted in accordance with European Union directive 2010/63/EU and was  
159 approved by the National Animal Research Authority (ID 5441). The rats were around an age  
160 of 3 months at the start of the experiment.

161

162 *Surgeries*

163           The procedures were described previously in [17]. Briefly, all females were  
164 ovariectomized upon arrival. Operations were done under isoflurane anesthesia and  
165 afterwards rats were checked twice daily for 3 days and treated with 0,05 mg/kg  
166 buprenorphine every 12 hours (subcutaneously). After obtaining one session of sexual



167 experience two weeks after ovariectomy, seven females and five males were devocalized 3  
168 weeks before they entered the seminatural environment (DEV). Two-centimeter incision was  
169 made on the ventral surface of the neck, sternohyoideus muscles were separated and trachea  
170 exposed. Next, recurrent laryngeal nerves were cleared from fascia and bilaterally 3mm  
171 section of the nerve was removed. The control rats (CTR) received sham surgery (similar  
172 procedure, but the nerve was left intact). All animals recovered well from the surgeries.

173

#### 174 *Seminatural environment*

175         The seminatural environment (2.4 x 2.1 x 0.75 meters) setup is previously described  
176 and illustrated in [27-30]. It consists of a burrow system and an open field area, which are  
177 connected by four 8 x 8 cm openings. The burrow system consists of an interconnected tunnel  
178 maze (7.6 cm wide and 8 cm high) with 4 nest boxes (20 x 20 x 20 cm) attached, and is  
179 covered with Plexiglas. The open area has 75cm high walls, and contains two partitions (40 x  
180 75 cm) to simulate obstacles in nature. A light blocking wall (made of light blocking cloth)  
181 between the burrow and the open field allows the light intensity for both arenas to be  
182 controlled separately. The burrow system remained in total darkness for the duration of the  
183 experiment, while a day-night cycle was simulated in the open area with a lamp 2.5 m above  
184 the center that provided 180 lux from 22.45h to 10.30h and approximately 1 lux from 10.30h  
185 to 11.00h (the equivalent of moonlight). The light gradually increased/decreased during 30  
186 minutes between 1 and 180 lux.

187         The floors of both the open area and on the burrow system were covered with a 2 cm  
188 layer of aspen wood chip bedding (Tapvei, Harjumaa, Estonia). In addition, the nest boxes  
189 were provided with 6 squares of nesting material each (nonwoven hemp fibres, 5 x 5 cm, 0.5  
190 cm thick, Datesend, Manchester, UK), and the open area was equipped with 3 red  
191 polycarbonate shelters (15 x 16.5 x 8.5 cm, Datesend, Manchester, UK) and 12 aspen wooden

192 sticks (2 x 2 x 10 cm, Tapvei, Harjumaa, Estonia). Food was provided in one large pile of  
193 approximately 2 kg in the open area close to the water supply. Water was available ad libitum  
194 in four water bottles.

195 Two video cameras (VCC-6592; Sanyo, Tokyo, Japan) equipped with a zoom lens  
196 (T6Z5710-CS 5.7–34.2 mm; Computar, San Jose, CA, USA) were mounted on the ceiling 2  
197 meters above the seminatural environment: one above the open field and another above the  
198 burrow system. Infrared lamps provided light for the video camera centered above the  
199 burrow.

200

### 201 *Procedure and design*

202 Shortly before (circa 72 hours) being introduced into the seminatural environment, the  
203 sham and devocalized males and females were tested for the presence or absence of  
204 vocalizations, respectively. As previously described, the male and female rats (who were  
205 sexually receptive at this point) were placed in two adjacent chambers covered with sound-  
206 absorbing isolation material of extruded polyethylene foam and separated by a wire mesh. A  
207 high-frequency sensible microphone (Metris, Hoofddorp, Netherlands) was placed above each  
208 chamber and adjusted so that all sounds from within the chamber were recorded, while sounds  
209 from the adjacent chamber were not captured by the microphone. The microphone was  
210 connected to a computer with the Sonotrack sound analysis system. All devocalized rats used  
211 in this experiment did not emit any USV, while the sham animals did.

212 Before introduction to the seminatural environment, the subjects' backs were shaved  
213 and tails marked for individual recognition. Four cohorts of four females and three males  
214 were used (resulting in a total number of 9 control females, 7 devocalized females, 7 control  
215 males and 5 devocalized males; see Supplementary Table 1). Animals in each cohort came  
216 from different cages to ensure that they were previously unfamiliar to each other.

217 Each cohort lived in the seminatural environment for a total of 8 days with full-time  
218 recording of all behaviors. After the experiment, the rats were removed from the seminatural  
219 environment, the environment was thoroughly cleaned and bedding/nesting materials and  
220 food were changed, before a new cohort was introduced.

221

### 222 *Behavioral observation*

223 An experienced observer, blinded for the treatment of rats, scored the behavioral  
224 activity of each rat with Noldus Observer XT (Netherlands) during the first 60 minutes after  
225 introduction to the seminatural environment. One of 18 different behaviors (see Table 1) was  
226 assigned to each rat at any time. Where possible, up to four clarifying modifiers were added:  
227 (1) the location where the behavior took place, (2) the partner/recipient of the behavior, (3) if  
228 there was a tactile contact with another rat or not and (4) if the given animal initiated the  
229 behavior or responded to another rat.

230

### 231 **Table 1 Description of recorded behaviors**

| Behavior                     | Description                                                                                                       |
|------------------------------|-------------------------------------------------------------------------------------------------------------------|
| Walking/running              | Walking or running through the environment                                                                        |
| Chasing                      | Running forward in the direction of a conspecific                                                                 |
| Non-social exploration       | Exploring the environment by sniffing, usually when slowly walking or sitting still                               |
| Interacting with environment | Digging, pushing or carrying bedding/nesting/food material                                                        |
| Passive alone                | Sitting or sleeping with minimal movement of the head without other rats in close vicinity                        |
| Passive socially             | Sitting or sleeping with minimal movement of the head with at least 1 other rat on maximum 1 rat body length away |
| Hiding alone                 | Being in the shelter alone                                                                                        |
| Hiding socially              | Being in the shelter with at least one other rat                                                                  |
| Allogrooming                 | Grooming any part of a conspecific's body, usually on the head or in the neck region                              |
| Sniffing anogenitally        | Sniffing the anogenital region of the conspecific                                                                 |
| Sniffing nose-to-nose        | Sniffing the facial region of the conspecific                                                                     |

|                     |                                                                                               |
|---------------------|-----------------------------------------------------------------------------------------------|
| Sniffing body/head  | Sniffing any part of the conspecifics body or head, except for the anogenital and nose region |
| Fighting            | Kicking, pouncing, pushing, grabbing, boxing or wrestling another rat                         |
| Nose-off            | Facing another rat and aggressively posturing towards it                                      |
| Self-grooming       | Grooming itself                                                                               |
| Rearing supported   | Raising itself upright on its hind paws, facing a wall or an object                           |
| Rearing unsupported | Raising itself upright on its hind paws, not facing a wall or an object                       |
| Any other behavior  | Behaviors that do not fit any of the other categories (e.g. mounting, drinking, etc)          |

232

233 **Table 2 Description of behavioral clusters**

| Cluster                      | Behaviors within clusters                                                          |
|------------------------------|------------------------------------------------------------------------------------|
| Social investigation         | Sniffing anogenitally, sniffing nose-to-nose, sniffing body/head, and allogrooming |
| Non-social investigation     | Walking/running, non-social exploration                                            |
| Conflict behaviors           | Nose-off, fighting                                                                 |
| Passive behaviors            | Passive alone, passive socially                                                    |
| Social passive behaviors     | Passive socially, hiding socially,                                                 |
| Non-social passive behaviors | Passive alone, hiding alone                                                        |
| All passive behaviors        | Social and non-social passive behaviors                                            |
| Hiding                       | Hiding alone, hiding socially                                                      |
| All sniffing                 | Sniffing anogenitally, sniffing nose-to-nose, sniffing body/head                   |
| All rearing                  | Rearing supported, rearing unsupported                                             |

234

235 *Data preparation and analysis*

236 For each rat the frequency and duration of each behavior was calculated for the whole  
 237 hour in the whole arena, along with the same parameters separated by location and in 10-  
 238 minute timebins. For the relevant behaviors, latencies for first instance of the behavior for  
 239 each rat were analysed. Additionally, same parameters for social behaviors received by each  
 240 rat were calculated. For better comprehension, we generated the following behavioral clusters  
 241 (see Table 2): *social investigation* (consisting of sniffing anogenitally, sniffing nose-to-nose,  
 242 sniffing body/head and allogrooming), *non-social investigation* (consisting of  
 243 walking/running and non-social exploration), *conflict behaviors* (consisting of fighting and  
 244 nose-off), *passive behaviors* (consisting of passive alone and passive socially), *social passive*

245 *behaviors* (consisting of passive socially and hiding socially), *non-social passive behaviors*  
246 (consisting of passive alone and hiding alone), *all passive behaviors* (consisting of passive  
247 alone, passive socially, hiding alone and hiding socially), *hiding* (consisting of hiding alone  
248 and hiding socially), *all sniffing* (consisting of sniffing anogenitally, sniffing nose-to-nose and  
249 sniffing body/head) and *all rearing* (consisting of rearing supported and rearing unsupported).  
250 Similarly, to individual behaviors for each rat the frequency, duration and mean duration of  
251 episode of each behavioral cluster was calculated for the whole hour in the whole arena, along  
252 with the same parameters separated by location and into 10-minute timebins. To further  
253 investigate social behavior, we also calculated how fast each rat met each of their  
254 conspecifics, the mean duration of their social interactions, how much time overall did they  
255 spend in tactile contact with conspecifics, ratio of social activity (time in social  
256 behaviors/overall time), ratio of active non-social behavior (non social  
257 investigation/immobility), ratios of different types of sniffing, percentage of unsupported  
258 rearing (unsupported rearing/all rearing), and how much time they spent on open arena doing  
259 non-social behaviors.

260 For analysis of the data of the whole hour, a linear mixed model with rat as subject  
261 and *treatment* and *sex* as factors was used (IBM SPSS Statistics 26). We used a modified  
262 Benjamini-Hochberg procedure (instead of using all possible comparisons, which would yield  
263 too strict criteria for behavioral data, we only used p-values of four predetermined clusters: all  
264 sniffing, non-social investigation, self-grooming and conflict behavior, in addition to all  
265 behaviors with  $p < 0.05$ ) to correct for multiple comparison analysis. The data separated into  
266 10-minute timebins was analyzed with a repeated measures ANOVA with *time* as a within-  
267 subject factor and *treatment* and *sex* as between-subject factors. If Mauchly's test of sphericity  
268 yielded  $p < 0.05$ , Greenhouse-Geisser test of within-subjects effects is reported, otherwise if

269 Mauchly's test of sphericity yielded n.s., sphericity assumed test of within-subjects effects is  
270 reported.

271 One devocalized female rat was excluded from the analysis because she spent an  
272 overwhelming majority of the time passively (87% of the overall time, in comparison to  
273 others with on average  $2.8 \pm .3\%$ ). The reason remains unclear, but therefore the data  
274 throughout the manuscript is presented without this rat.

275

276 *Statement Open Science Framework (OSF)*

277 The design of our study was preregistered on OSF on the 17<sup>th</sup> of December 2019  
278 (<https://osf.io/gzkjw>). We refrained from the analysis of entry and re-entry latencies of  
279 different parts of the environment, because first rats were entered into the environment before  
280 starting the videos and therefore we were not able to collect complete data; otherwise there  
281 were no changes in analysis.

282

## 283 **Results**

284 Since our data analysis generated a lot of data, we only report the most relevant  
285 findings from the total environment in this section. For more details on different aspects of  
286 the data, or the data from the open area and burrow alone, please turn to the supplementary  
287 Tables 2-5. In addition, a summary of the main findings described below can be found in  
288 Table 3.

289

290 *Social investigation*

291 As mentioned in the introduction, social behavior is a complex behavior that involves  
292 multiple aspects. Besides the different categories of social behavior, it also involves the  
293 interaction between two or more animals and thus the differentiation in whether a rat is the

294 initiator or responder to a social interaction. To investigate the role of USVs in social  
295 behavior, we explored parameters linked to social behavior. We studied the time it took to  
296 meet all new conspecifics, the frequency and duration of social behaviors in total as well as  
297 initiator or responder, the length of social interaction bouts and the frequency, duration and  
298 average time they were being socially investigated. In addition, we analyzed how much of  
299 these episodes contained actual tactile contact. Interestingly, no differences were found in any  
300 of these parameters between silent (DEV) and vocalizing (CTR) female and/or male rats.

301 First of all, we found that cohort members met very quickly, as most animals had  
302 actively sniffed more than half of their new cohort members within the first minute and had  
303 mostly approached all six of their new cohabitants within the first 5 minutes. No differences  
304 were found between CTR and DEV animals in terms of latency to approach new conspecifics  
305 or being approached by conspecifics (effect of treatment  $F_{(1,23)}=.196$ ; n.s. Fig 1A). In addition,  
306 no differences were found between time spent on social investigation behavior (effect of  
307 treatment on social investigation  $F_{(1,23)}=.039$ ; n.s. Fig 1B) or its separate subcomponents of  
308 social behaviors between CTR and DEV rats (Fig S1A, B, C, Supplementary Table 2). We  
309 only found that male rats spent in general more time sniffing the anogenital or body regions  
310 than female rats, but no significant treatment\*sex interaction effect was found (see  
311 Supplementary Tables 2&3). Similar results were found in the time receiving social  
312 investigation behaviors (or its subcomponents) from conspecifics (without necessarily  
313 responding to it: effect of treatment on social investigation behavior  $F_{(1,23)}=.007$ ; n.s. Fig 1C)  
314 or with regard to the length of the social interaction bouts (effect of treatment: dyads with  
315 DEV rat  $F_{(1,23)}<0.01$ , n.s.; dyads with CTR rat  $F_{(1,23)}=0.81$ , n.s., DEV-DEV vs CTR-CTR  
316 dyads  $F_{(1,23)}=1.923$ ; n.s. Fig S1L, M). Not even when only the first 10 encounters were  
317 analyzed separately effect of treatment  $F_{(1,23)}=2.298$ ; n.s. Fig S1H, Supplementary Table 2).

318 Also when the social behaviors were divided in the episodes in which a rat was the  
319 initiator versus the responder or with/without tactile contact, DEV rats initiated (effect of  
320 treatment  $F_{(1,23)}=.496$ ; n.s. Fig 1D) and spent a similar amount of time on initiated social  
321 behaviors (effect of treatment  $F_{(1,23)}=.218$ ; n.s. Fig S1D) as CTR rats. Similarly, there were no  
322 differences in episodes of responding to others (effect of treatment  $F_{(1,23)}=.011$ ; n.s. Fig 1E) or  
323 duration of responding to others ( $F_{(1,23)}=.001$ ; n.s.) in social investigation behavior. It should  
324 be mentioned, though, that it is sometimes unclear in a seminatural environment which animal  
325 initiates the interaction. This limitation was solved by scoring both participants of the social  
326 interaction as initiators. Moreover, it was found that the overall time spent *with* tactile contact  
327 (effect of treatment  $F_{(1,23)}=.016$ ; n.s. Fig 1F) and the average length of these interactions were  
328 not different in CTR and DEV rats (Fig S1I, Supplementary Table 2).

329 Furthermore, the data revealed no differences in any other behavior involving a  
330 conspecific that could have been affected by devocalization, such as following, passive  
331 socially and conflict behavior. There was no difference between vocalizing and silent animals  
332 in how much time they were being followed (effect of treatment  $F_{(1,23)}=.024$ ; n.s. Fig 1G) or  
333 how much they followed others (effect of treatment  $F=.005$ ; n.s. Fig 1H). Also, when we  
334 looked at whom they follow (behaviors following DEV and following CTR rats are corrected  
335 according to the number of available partners in a given cohort; Fig S1J, K), no significant  
336 differences were found. The data analysis of following behavior only revealed a significant  
337 sex effects in that female rats were more often being followed (effect of sex  $F_{(1,23)}=4.96$ ;  
338  $p=.04$ ) and males doing most of the following (effect of sex  $F_{(1,23)}=17.32$ ;  $p<.001$ ). However,  
339 there was no significant interaction effect between treatment and sex (Supplementary Tables  
340 2&3). Additionally, we found that silent DEV rats spent a comparable amount of time on  
341 passive social behavior (and its subcomponents) to vocalizing CTR rats (effect of treatment  
342  $F_{(1,23)}=.085$ ; n.s. Fig 1I), neither did we find differences on the time spent on conflict behavior



343 of DEV and CTR rats, neither as an active partner nor as receiving the conflict (effect of  
 344 treatment as aggressive party  $F_{(1,23)}=.413$ ; n.s. Fig 1J and effect of treatment as recipient  
 345  $F_{(1,23)}=.024$ ; n.s. Fig 1K, refer to the Supplementary Table 2 for mean values).

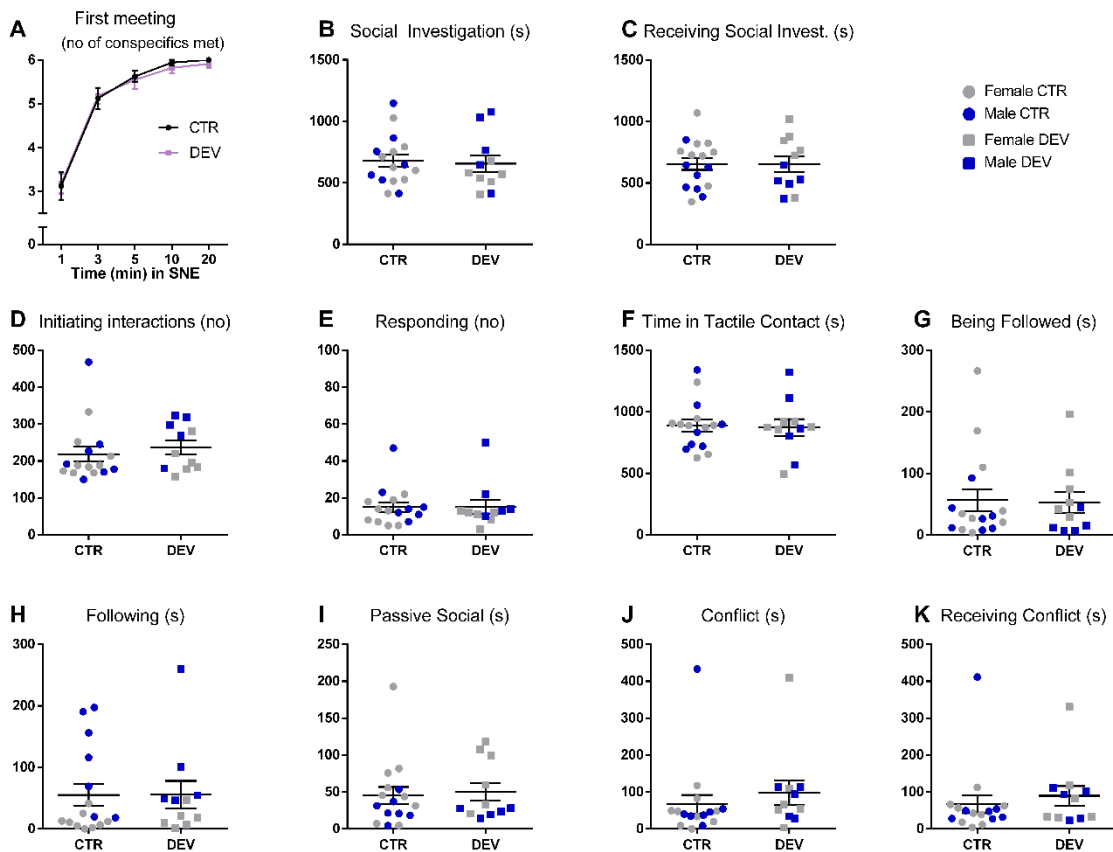

346

347 **Figure 1.** Social behavior of devocalized (DEV,  $n=11$ ) and sham-operated control (CTR,  
 348  $n=16$ ) rats. (A) The number of different conspecifics that were met within 1, 3, 5, 10 and 20  
 349 minutes. (B) Time spent on social investigation (sniffing anogenitally, sniffing nose-to-nose,  
 350 sniffing body/head, and allogrooming). (C) Time being socially investigated by conspecifics.  
 351 (D) Number of initiated social interactions. (E) Number of responses to a social interaction  
 352 initiated by a conspecific. (F) Time spent in tactile contact with other rats. (G) Time being  
 353 followed by a conspecific. (H) Time spent on following other rats. (I) Time spent on being  
 354 passive socially (hiding and passive socially). (J) Time spent on conflict behavior (fighting or  
 355 nose-off) with conspecifics. (K) Time receiving conflict behaviors from conspecifics. Data are  
 356 shown with individual data points (females in grey, males in blue) with the lines representing  
 357 the group means. Error bars are representing standard error of the mean SEM. s = seconds,  
 358 no = number of episodes.

359

360 *Non-social investigation and other behaviors*

361 Besides social behaviors, USVs could also affect emotional state of the vocalizing  
362 animal itself, which could then influence their non-social investigation patterns in a novel  
363 environment or their stress-coping behavior. For example, if USVs had a comforting effect on  
364 the rat itself, one could hypothesize that CTR rats might feel safer to explore the novel  
365 environment than a DEV rats. Therefore, our study also investigated the non-social  
366 investigation strategies of the rats, in addition to parameters like self-grooming, rearing, and  
367 time spent in the open area.

368 However, analysis of the overall time spent investigating the environment (effect of  
369 treatment  $F_{(1,23)}=.612$ ; n.s. Fig 2A), in addition to the separate subcomponents  
370 walking/running (effect of treatment  $F_{(1,23)}=.30$ ; n.s.) and non-social exploration (effect of  
371 treatment  $F_{(1,23)}=.33$ ; n.s.), did not reveal any differences between CTR and DEV rats. There  
372 was, though, a sex effect showing that females spent more time on non-social investigation  
373 than males (effect of sex  $F_{(1,23)}=14.27$ ;  $p=.001$ ), but no interaction effect between sex and  
374 treatment was found.

375 Rearing to hind legs provides superior vantage point to investigate the surrounding  
376 social and physical environment. We made a distinction between supported and unsupported  
377 rearing with the idea that unsupported rearing has been shown to be modulated by anxiety-  
378 like states [31]. If emitting USVs would induce a comforting effect, one could assume that  
379 CTR rats show more unsupported rearing. In our experiment, however, no effect was found  
380 on supported rearing nor unsupported rearing (supported rearing: effect of treatment  $F=.087$ ;  
381 n.s. Fig 2B; unsupported rearing: effect of treatment  $F_{(1,23)}=.703$ ; n.s. Fig 2C). Also when  
382 unsupported and supported rearing were combined, no differences between CTR and DEV  
383 were found (effect of treatment  $F_{(1,23)}=.267$ ; n.s. Fig S1N), except that females rear more often  
384 than males (effect of sex  $F_{(1,23)}=5.786$ ;  $p=.025$ ).

385           Other behaviors that could be linked to anxiety-like states and could thus theoretically  
386 be affected by USVs if these play a role on emotional state, are behaviors like digging,  
387 transporting the bedding material, nesting material and food (combined in the cluster  
388 “interaction with the environment”), self-grooming and the time spent in open arena. Data  
389 analysis revealed, though, that there were no effects of the absence of USVs on interacting  
390 with the environment (effect of treatment  $F_{(1,23)}=.173$ ; n.s. Fig 2D), nor on the amount of time  
391 spent in the open arena including (effect of treatment  $F_{(1,23)}=.839$ ; n.s.) or excluding the  
392 episodes in which they participated in social interactions (effect of treatment  $F_{(1,23)}=.735$ ;  
393 n.s.). It was found, though, that male rats spent in general more time in open area compared to  
394 females (including social interactions: effect of sex  $F_{(1,23)}=17.008$ ;  $p<.001$ ; excluding social  
395 interaction: effect of sex  $F_{(1,23)}=14.403$ ;  $p=.001$ ; Fig 2E). Female rats, on the other hand, spent  
396 more time in the burrow (tunnels and nestboxes; effect of sex  $F_{(1,23)}=16.432$ ;  $p<.001$ ), but no  
397 effects of treatment were found between CTR and DEV rats (effect of treatment  $F_{(1,23)}=.879$ ;  
398 n.s. Fig 2G).

399           With regard to self-grooming, a potential measure for stress-coping behavior [32-34],  
400 male rats self-groomed more ( $F_{(1,23)}=13.68$ ;  $p=.001$ ) and longer ( $F_{(1,23)}=13.41$ ;  $p<.001$  Fig 2F)  
401 than female rats, but no effect of treatment (number of episodes  $F_{(1,23)}=.164$ ; n.s.; time spent  
402  $F_{(1,23)}=.92$ ; n.s.) or interaction effects of sex\*treatment were found.

403           It should be mentioned, though, that anxiety-like states can be accompanied by  
404 behavioral inhibition, which can manifest in delayed onset of natural maintenance and  
405 exploratory behaviors. But when we compared the latencies to start self-grooming (effect of  
406 treatment  $F_{(1,23)}=.337$ ;  $p=.57$ , Fig S1O), unsupported rearing (effect of treatment  
407  $F_{(1,23)}=.09$ ;  $p=.77$ ) or other behaviors (Supplementary Table 4), no differences between CTR  
408 and DEV rats were found.

409

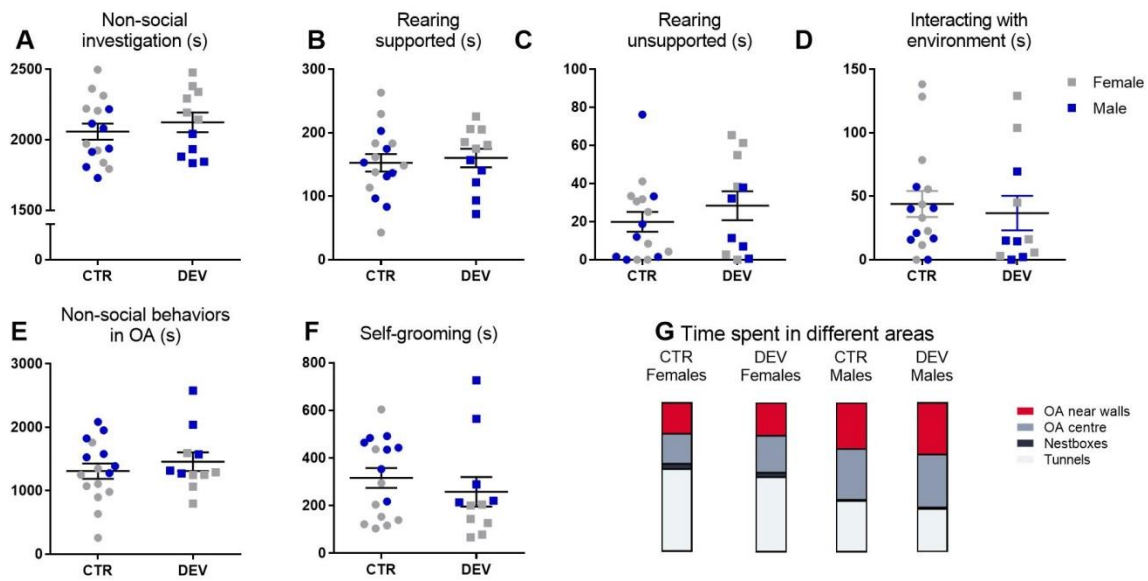

410

411 **Figure 2.** Non-social behavior of devocalized (DEV, n=11) and sham-operated control (CTR, n=16) rats. (A) Time spent on non-social investigation behavior. (B-C) Time spent on rearing supported and unsupported. (D) Time spent on interacting with the environment. (E) Time spent in the open area (OA) (excluding social interactions) (F) Time spent on self-grooming. (G) Relative time spent in the different areas of the environment. The height of the colored box represents the proportion of time the rats of the given group on average spent in respective area. Data in A-F are shown with individual data points (females in grey, males in blue) with the lines representing the group means. Error bars are representing standard error of the mean SEM. s = seconds.

420

421 Behavioral patterns during the course of an hour

422 At last, we investigated how the behavioral patterns of the rats changed over the course of the hour to detect if there are any deviations in how devocalized animals habituate to the novel social and non-social environment. Therefore, we divided the data into six 10-minute time-bins and analyzed the behavioral patterns cumulatively.

426 As expected, some behaviors were performed more or less in the beginning than in the end. The amount of time spent on social investigation (effect of time  $F_{(5,115)}=6.74$ ;  $p<0.001$ ; Fig 3A), being socially investigated (time effect  $F_{(5,115)}=5.899$ ;  $p<0.001$ ; Fig S2A, Fig

429 S3C&D), and non-social investigation (effect of time  $F_{(3,322,76.399)}=12.03$ ;  $p<0.001$ ; Fig 3B)  
430 slightly decreased over the course of an hour, whereas the time spent on rearing (effect of  
431 time  $F_{(5,115)}=2.013$ ; n.s. Fig S2D, especially unsupported rearing: effect of time  $F_{(5,115)}=2.726$ ;  
432  $p=0.023$ ), self-grooming (effect of time  $F_{(3,039,69.896)}=13.26$ ;  $p<0.001$ ; Fig S2B), and passive  
433 behavior ( $F_{(2,908,66.874)}=4.20$ ;  $p=0.009$ ; Fig S2C) increased over the course of an hour.

434 Some sex differences were found in these behavioral patterns: male rats showed a  
435 steeper decrease in time being socially investigated over the hour (time\*sex interaction effect  
436  $F_{(1,223,28.132)}=6.274$ ;  $p=.014$ ) and a faster increase in self-grooming behavior (effect of  
437 time\*sex interaction  $F_{(1,419,32.647)}=14.82$ ;  $p<0.001$ ) compared to females, while females declined  
438 faster in the time spent on non-social investigation (effect of time\*sex interaction  
439  $F_{(1,562,35.917)}=13.57$ ;  $p<0.001$ ). With regard to rearing, females reared more at the beginning of  
440 the experiment and less near the end (effect of time\*sex interaction  $F_{(1,621,37.294)}=3.636$ ;  
441  $p=.045$ ; post-hoc: males vs females for first ten minutes and second ten minutes  $p=.037$ ; for  
442 40-50 minutes  $p=.021$ ), while males were initially rearing less with support compared to  
443 females (effect of time\*sex interaction  $F_{(1,851,42.572)}=5.213$ ;  $p=.011$ ). But no remarkable  
444 interaction effects with treatment (CTR versus DEV) were found.

445 Only in terms of the amount of time rats spent on social investigation behavior, we  
446 found that DEV rats spent slightly less time on these behaviors within the first 10 minutes  
447 compared to CTR rats ( $p=.012$ ), but this effect disappeared immediately and resulted in an  
448 overall lack of interaction effect over the course of an hour (time\*treatment interaction  
449  $F_{(1,172,26.949)}=.11$ ; n.s.). Besides, none of the subcomponents of time spent on social  
450 investigation showed differences between CTR and DEV rats when analyzed separately.  
451 When the data was further divided into 1-minute time-bins, it became clear that the tendency  
452 towards a difference in social investigation behavior between CTR and DEV rats occurs in the

453 minutes between 3 and 12 (Fig S3A&B), after which the DEV rats catch up again with the  
454 CTR rats.

455 With regard to rearing, there was no overall time\*treatment effect (effect of time\*  
456 treatment interaction  $F_{(1.621,37.294)}=.03$ ; n.s.). However, silent rats did rear significantly more  
457 within the first ten minutes compared to vocalizing rats ( $p=.007$ ). This effect was probably  
458 caused by supported rearing ( $p=.006$ ). Further analysis into 1-minute time-bins revealed that  
459 the difference in supported rearing between CTR and DEV rats was present around the 1<sup>st</sup> to  
460 10<sup>th</sup> minute, after which they show comparable amount of rearing again (Fig S3E&F).

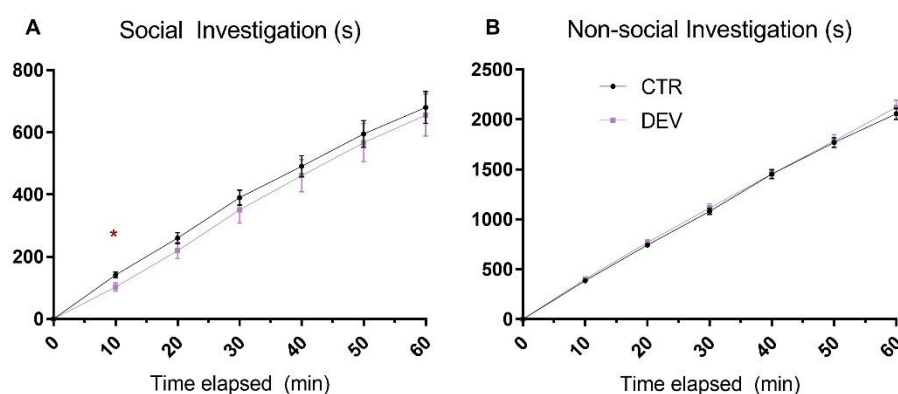

461

462 **Figure 3.** Behavioral patterns during the course of an hour in devocalized (DEV,  $n=11$ ) and  
463 sham-operated control (CTR,  $n=16$ ) rats. (A) The cumulative time spent on social  
464 investigation behavior. (B) The cumulative time spent on non-social investigation behavior.  
465 Data are shown in mean $\pm$ standard error of the mean per 10-minute time-bins. s = seconds, \*  
466  $p<0.05$  CTR versus DEV.

467

### 468 **Table 3. Summary of main findings**

---

No effects were found between CTR and DEV rats on the following parameters of social behaviors:

- latency to approach new conspecifics
- time spent on social investigation behavior
- time receiving social investigation behavior from conspecifics
- length of social investigation bouts
- time spent on social behavior as initiator or responder
- overall time spent with tactile contact
- average length of social interactions
- time spent on social passive behavior
- time spent on conflict behavior

- time spent on following behavior

---

No effects were found between CTR and DEV rats on the following parameters of non-social behaviors:

---

- overall time spent investigating the environment
  - time spent rearing
  - time spent interacting with the environment
  - time spent self-grooming
  - time spent in open area during non-social behaviors
- 

469

470

## 471 **Discussion**

472 In our study, we investigated the role of USVs in social interactions and non-social  
473 investigation of a novel environment with unfamiliar conspecifics in adult rats. Our findings  
474 show that silent and vocalizing rats behave very similarly in the first hour of exposure to the  
475 new environment. We found no differences in social interaction and non-social investigation  
476 behaviors between sham and devocalized rats. Silent rats spent comparable amount of the  
477 time on social interactions as vocalizing rats, independent of whether they were the initiator  
478 or the receiver. In addition, silent and vocalizing rats also familiarized in the same way with  
479 new neighbor conspecifics and novel environment, respectively.

480 This is in line with our hypothesis that was based on the findings of previous studies in  
481 which devocalization did not have an effect on sociosexual behavior with familiar rats [16-  
482 19]. Interestingly, though, our study is also in great agreement with another recent study by  
483 Redecker et al. who have studied the social behavior and USV production of heterozygous  
484 (*Cacna1c*<sup>+/-</sup>) and wildtype (*Cacna1c*<sup>+/+</sup>) rats [23], a genetic modification of calcium  
485 voltage-gated channel subunit that have been linked to deficits in social behavior in mice [35].  
486 Upon their expectations, they found that *Cacna1c*<sup>+/-</sup> rats emitted less USVs during social  
487 interactions than the controls. However, although their auditory cues were reduced, the rats,  
488 both mutated and wild type, did not show any differences in social behavior, measured as  
489 sniffing, following, social grooming and crawling under/over [23]. This study therefore

490 confirms our findings that a reduction (or depletion) of USVs does not affect social  
491 interaction behavior.

492 Our experiment revealed that the emission of USVs did not affect rats' approach  
493 behavior in the seminatural environment. This is somewhat contradicting with generally  
494 believed that USVs can facilitate temporary approach behavior in rats. Previous reports have  
495 shown such approach behavior to the playback of 50 kHz calls [10, 11, 36, 37]. However, we  
496 have not been able to replicate these findings on approach behavior even in a smaller arena  
497 [14, 15], and when rats were able to choose between an intact or devocalized conspecific, the  
498 silent rats were just as much approached and preferred as play or sexual partner as the  
499 vocalizing rats in traditional test settings [6, 36, 38, 39]. Therefore, it remains unclear what  
500 the function and significance of this sort of short-lasting approach behavior is.

501 *If* USVs indeed modulate rats' social interactions and induce approach behavior, it  
502 would mean that rats that are incapable of vocalizing should be approached less than intact  
503 conspecifics. Additionally, *if* USVs could act as a reinforcer of the behavior, the bouts of  
504 social interaction between two vocalizing rats should last longer than bouts between dyads  
505 from which one or both are devocalized. Another possibility could be that differences would  
506 have been found in the approach behavior towards which part of the body (anogenital region,  
507 body, nose) is targeted in devocalized and vocalizing rats. Consequently, if USVs played a  
508 role in modulating rats' social interactions, vocalizing rats should perform and/or receive  
509 more interactions compared to devocalized rats. However, in our experiment, there were no  
510 differences in how quickly devocalized and vocalizing control rats met their cohort members  
511 nor in any parameters regarding approach. Even though the vocalizing animals showed a  
512 tendency towards increased social investigation early in the experiment, devocalized animals  
513 displayed comparable amount of social investigation at the beginning and throughout the  
514 hour. It seems that the transient approach behavior, which has been reported in several



515 playback studies, is not easily reproducible in a more naturalistic settings with adult rats.  
516 Since the effect on approach has previously been found strongly in juvenile rats, and we have  
517 indeed replicated this approach (not published), it is also possible that the role of USVs could  
518 differ during lifetime. In general, social behavior of the adult rats in our experiment was not  
519 affected by their own nor their partner's ability to vocalize. This supports the idea that USVs  
520 do not play a significant role in modulating communication in adult rats.

521         This conclusion makes us wonder what could be the function of these calls then.  
522 Could, for instance, the ability to vocalize modulate rat's own or partner's emotional state?  
523 One study has shown how rats, that have been trained to react to different sounds to either  
524 earn a positive reward (sucrose) or to avoid unpleasant loud white noise, treat an ambiguous  
525 cue as positive (predicting reward) if it is preceded by the playback of 50 kHz calls and treat  
526 similar cue as negative (predicting unpleasant white noise) if preceded by 22 kHz calls [40].  
527 This implies that 22 kHz and 50 kHz calls are indeed involved in inducing negative and  
528 positive responses. In our study, however, we investigated whether potential feedback from  
529 vocalizing rat would change dynamics of the social interaction such as length of the  
530 interaction, preference for tactile contact or escalation to aggression. Interestingly, in the  
531 study by Redecker et al. it was found that the *Cacna1c*<sup>+/-</sup> rats, who have reduced USVs  
532 emission, did spend more time in physical contact than the *Cacna1c*<sup>+/+</sup> rats [23]. However,  
533 our findings did not show any signs of changes in physical contact, type of contact or  
534 escalation to aggression upon devocalization. The differences in results could then be  
535 explained by the use of a large seminatural environment in which rats are able to choose the  
536 type of interaction they prefer in the moment, instead of being forced into a certain behavior.  
537         Another possibility is that vocalizing itself can have a comforting effect on a rat and  
538 that devocalization could thus influence their stress-coping and/or non-social investigation  
539 behavior in the novel environment. For example, if USVs modulate anxiety/stress-like states

540 of the emitter, one could hypothesize that vocalizing rats should be more comfortable to  
541 initially explore the environment, rear more frequently, and spend more time in anxiogenic  
542 parts of the enclosure, and/or self-groom less than devocalized rats with less experiencing the  
543 comforting effect of emitting USVs. Such self-comforting effect was indeed reported in the  
544 study of *Cacna1c*<sup>+/-</sup> rats, as the mutated animals self-groom more, show less digging  
545 behavior and rearings when interacting in pairs than the control rats [23]. In the current  
546 context, however, we again found no differences between vocalizing and silent rats in terms  
547 of self-grooming or manipulating the environment (including digging). This does not  
548 necessarily contradict the previous findings, since the knockout strain *Cacna1c*<sup>+/-</sup> rats  
549 without the functional calcium voltage-gated channel subunit alpha 1 C could have different  
550 underlying reasons for this change in behavior. However, our findings at least suggest that the  
551 emission of USVs does not modulate stress-related behaviors. At the same time, it is still  
552 possible that USV emission is initiated by the same internal state that also facilitates the given  
553 behaviors, something we would not be able to see in our devocalized rats. The emitted USVs  
554 could then also in theory be a by-product of the given behaviors, which would then indicate  
555 that a change in these behaviors result in a reduced number of USVs, but not the other way  
556 around.

557         In our data, we did find an initial increase in supported rearing in devocalized rats. Our  
558 exploratory methods are not suitable to explain whether this increase in exploratory rearing is  
559 related to the reduced social investigation in the same time window (they can only perform  
560 one behavior at the same time), and could then just as well be explained as an unfortunate  
561 artifact. Unsupported rearing, which is linked to susceptibility to acute stress [31], was not  
562 affected by devocalization. Along with the lack of effects in the other behavioral parameters  
563 that could reflect anxiety/stress-like states such as self-grooming (time spent and latency to

564 start) and the time spent in the anxiogenic parts of the environment, our data suggests that the  
565 ability to vocalize does not modulate rats' anxiety/stress-like states.

566 Previously, we and others have suggested that this could mean that USVs may be  
567 purely a byproduct of the arousal linked to the behaviors [41-43], and that 50-kHz USVs are  
568 just a by-product of locomotion and breathing. It should be mentioned, though, that the  
569 advances in research techniques have now made it possible to study this possibility in more  
570 detail and resulted in the conclusion that USVs are not just simply a byproduct. Evidence  
571 showed that the emitted USVs are indeed tightly linked to locomotion [25], breathing [44]  
572 and cardiovascular function [43], and they are even interlocked with active sniffing [45].  
573 However, the fact that they also actively sniff without the emission of USVs [45], and can  
574 both vocalize without movement and move without vocalizing [25] weakens the by-effect  
575 argument. Besides, the vocal production apparently increases before locomotion begins [25],  
576 and a new call type can be started at any point during the exhalation phase [44, 46, 47]. It  
577 should be taken into account, though, that *if* USVs are more than just a by-effect of arousal,  
578 there should be more information in nuances of the vocal communication, as they have an  
579 extensive USV 'vocabulary' [48, 49]). So far, many studies have neglected the existence of  
580 this vocabulary, and the possible role different type of calls, and the sequence of calls, must  
581 have if USVs serve a communicative role after all. Thus, combining of our current data with  
582 other studies, we conclude that USVs are unlikely functioning for communication, neither are  
583 they involved in regulating non-social exploring behaviors.

584 It is important to mention, though we failed to found USVs' effect, that our study does  
585 not *exclude* the possibility that vocalizations play a communicative role in social and non-  
586 social behavior. It could simply be the case that other (multi)sensory cues are more relevant in  
587 these interactions, and compensate for the lack of vocalizations, something that we have  
588 shown before with approach behavior in a sexual context [50]. It could still be possible that if

589 rats are never exposed to auditory stimuli, they would fail to socially interact normally. It was  
590 shown by Kisko and colleagues that not only devocalized juvenile rats played less, but also  
591 that intact rats housed with devocalized rats showed reduced levels of play behavior [20].  
592 They suggested that rats could have a critical period in which the lack of exposure to  
593 vocalizations could determine their behavior later in life. This is an interesting theory that  
594 should be explored in the future, but our findings at least support the notion that vocalizations  
595 are not the most essential way of communication later in life.

596 In conclusion, our data shows that devocalized adult rats do not show altered social  
597 interaction behaviors due to their inability to vocalize. Silent and vocalizing rats show similar  
598 patterns and types of social interactions, and do not use other social and non-social  
599 investigation strategies when introduced to a novel environment with unfamiliar conspecifics.  
600 Our data, therefore, does not provide any evidence that USVs play a communicate role in  
601 social behavior, nor do they serve a role in regulating non-social investigation behaviors.  
602 Although it cannot be excluded that USVs play some unrevealed role in social behavior, it is  
603 clear that other non-USV sensory cues are more relevant in these interactions and could have  
604 compensated for the lack of vocalizations. New interesting research techniques using complex  
605 algorithms to link behaviors to distinct pattens of USVs, as those used nowadays for mice  
606 [51], are needed in the future to explore the potential role of USVs in social behavior in  
607 naturalistic environments.

608

## 609 **Acknowledgements**

610 We also would like to thank Ragnhild Osnes, Carina Sørensen, Nina Løvhaug, Katrine  
611 Harjo, and Remi Osnes for their excellent care of the animals.

## References:

- [1] Darwin, C. The descent of man, and selection in relation to sex. New York,: D. Appleton and company; 1871.
- [2] Witzany, G. Biocommunication of animals. 1st ed. Dordrecht: Springer Netherlands : Imprint: Springer,; 2014. p. 1 online resource (XIII, 420 pages 68 illustrations, 44 illustrations in color.
- [3] Anderson, J. W. The production of ultrasonic sounds by laboratory rats and other mammals. *Science*. 1954,119:808.
- [4] Wöhr, M., Schwarting, R. K. W. Affective communication in rodents: Ultrasonic vocalizations as a tool for research on emotion and motivation. *Cell and Tissue Research*. 2013,354:81-97.
- [5] Bialy, M., Rydz, M., Kaczmarek, L. Precontact 50-khz vocalizations in male rats during acquisition of sexual experience. *Behavioral Neuroscience*. 2000,114:983-90.
- [6] Snoeren, E. M., Ågmo, A. The role of odors and ultrasonic vocalizations in female rat (*rattus norvegicus*) partner choice. *J Comp Psychol*. 2014,128:367-77.
- [7] Snoeren, E. M., Helander, L. R., Iversen, E. E., Ågmo, A. On the role of individual differences in female odor and ultrasonic vocalizations for male's choice of partner. *Physiol Behav*. 2014,132:17-23.
- [8] Mu, P., Fuchs, T., Saal, D. B., Sorg, B. A., Dong, Y., Panksepp, J. Repeated cocaine exposure induces sensitization of ultrasonic vocalization in rats. *Neurosci Lett*. 2009,453:31-5.
- [9] Williams, S. N., Undieh, A. S. Brain-derived neurotrophic factor signaling modulates cocaine induction of reward-associated ultrasonic vocalization in rats. *J Pharmacol Exp Ther*. 2010,332:463-8.

- [10] Wöhr, M., Schwarting, R. K. W. Ultrasonic communication in rats: Can playback of 50-khz calls induce approach behavior? PLOS ONE. 2007,2:e1365.
- [11] Schönfeld, L.-M., Zech, M.-P., Schäble, S., Wöhr, M., Kalenscher, T. Lesions of the rat basolateral amygdala reduce the behavioral response to ultrasonic vocalizations. Behav Brain Res. 2020,378:112274.
- [12] Willadsen, M., Seffer, D., Schwarting, R. K., Wöhr, M. Rodent ultrasonic communication: Male prosocial 50-khz ultrasonic vocalizations elicit social approach behavior in female rats (*rattus norvegicus*). J Comp Psychol. 2014,128:56-64.
- [13] Melo-Thomas, L., Tonelli, L. C., Müller, C. P., Wöhr, M., Schwarting, R. K. W. Playback of 50-khz ultrasonic vocalizations overcomes psychomotor deficits induced by sub-chronic haloperidol treatment in rats. Psychopharmacology (Berl). 2020,237:2043-53.
- [14] Snoeren, E. M. S., Ågmo, A. The incentive value of males' 50-khz ultrasonic vocalizations for female rats (*rattus norvegicus*). Journal of Comparative Psychology. 2014,128:40-55.
- [15] Snoeren, E. M., Ågmo, A. Female ultrasonic vocalizations have no incentive value for male rats. Behavioral neuroscience. 2013,127:439-50.
- [16] Snoeren, E. M. S., Ågmo, A. The role of odors and ultrasonic vocalizations in female rat (*rattus norvegicus*) partner choice. Journal of Comparative Psychology. 2014,128:367-77.
- [17] Chu, X., Snoeren, E., Ågmo, A. Functions of vocalization in sociosexual behaviors in rats (*rattus norvegicus*) in a seminatural environment. J Comp Psychol. 2017,131:10-8.
- [18] Thomas, D. A., Takahashi, L. K., Barfield, R. J. Analysis of ultrasonic vocalizations emitted by intruders during aggressive encounters among rats (*rattus norvegicus*). J Comp Psychol. 1983,97:201-6.
- [19] White, N. R., Barfield, R. J. Role of the ultrasonic vocalization of the female rat (*rattus norvegicus*) in sexual behavior. US: American Psychological Association; 1987. p. 73-81.

- [20] Kisko, T. M., Wöhr, M., Pellis, V. C., Pellis, S. M. From play to aggression: High-frequency 50-khz ultrasonic vocalizations as play and appeasement signals in rats. In: Wöhr M, Krach S, eds. Social behavior from rodents to humans: Neural foundations and clinical implications. Cham: Springer International Publishing; 2017. p. 91-108.
- [21] Chen, P., Hong, W. Neural circuit mechanisms of social behavior. *Neuron*. 2018,98:16-30.
- [22] Titze, I. R., Palaparthi, A. Radiation efficiency for long-range vocal communication in mammals and birds. *J Acoust Soc Am*. 2018,143:2813.
- [23] Redecker, T. M., Kisko, T. M., Schwarting, R. K. W., Wöhr, M. Effects of cacna1c haploinsufficiency on social interaction behavior and 50-khz ultrasonic vocalizations in adult female rats. *Behav Brain Res*. 2019,367:35-52.
- [24] Ågmo, A., Snoeren, E. M. S. Silent or vocalizing rats copulate in a similar manner. *PLOS ONE*. 2015,10:e0144164.
- [25] Laplagne, D. A., Elías Costa, M. Rats synchronize locomotion with ultrasonic vocalizations at the subsecond time scale. *Frontiers in behavioral neuroscience*. 2016,10:184-.
- [26] Ågmo, A., Snoeren, E. M. Silent or vocalizing rats copulate in a similar manner. *PLoS One*. 2015,10:e0144164.
- [27] Chu, X., Ågmo, A. Sociosexual behaviours in cycling, intact female rats (*rattus norvegicus*) housed in a seminatural environment. *Behaviour*. 2014,151:1143-84.
- [28] Heinla, I., Heijkoop, R., Houwing, D. J., Olivier, J. D. A., Snoeren, E. M. S. Third-party prosocial behavior in adult female rats is impaired after perinatal fluoxetine exposure. *Physiol Behav*. 2020,222:112899.
- [29] Houwing, D. J., Heijkoop, R., Olivier, J. D. A., Snoeren, E. M. S. Perinatal fluoxetine exposure changes social and stress-coping behavior in adult rats housed in a seminatural environment. *Neuropharmacology*. 2019,151:84-97.

- [30] Snoeren, E. M., Antonio-Cabrera, E., Spiteri, T., Musatov, S., Ogawa, S., Pfaff, D. W., et al. Role of oestrogen alpha receptors in sociosexual behaviour in female rats housed in a seminatural environment. *J Neuroendocrinol.* 2015,27:803-18.
- [31] Sturman, O., Germain, P. L., Bohacek, J. Exploratory rearing: A context- and stress-sensitive behavior recorded in the open-field test. *Stress.* 2018,21:443-52.
- [32] Spruijt, B. M., van Hooff, J. A., Gispen, W. H. Ethology and neurobiology of grooming behavior. *Physiological reviews.* 1992,72:825-52.
- [33] Dunn, A. J., Berridge, C. W., Lai, Y. I., Yachabach, T. L. Crf-induced excessive grooming behavior in rats and mice. *Peptides.* 1987,8:841-4.
- [34] Choleris, E., Thomas, A. W., Kavaliers, M., Prato, F. S. A detailed ethological analysis of the mouse open field test: Effects of diazepam, chlordiazepoxide and an extremely low frequency pulsed magnetic field. *Neurosci Biobehav Rev.* 2001,25:235-60.
- [35] Kabir, Z. D., Che, A., Fischer, D. K., Rice, R. C., Rizzo, B. K., Byrne, M., et al. Rescue of impaired sociability and anxiety-like behavior in adult *cacna1c*-deficient mice by pharmacologically targeting *eif2 $\alpha$* . *Molecular psychiatry.* 2017,22:1096-109.
- [36] Seffer, D., Rippberger, H., Schwarting, R. K. W., Wöhr, M. Pro-social 50-khz ultrasonic communication in rats: Post-weaning but not post-adolescent social isolation leads to social impairments-phenotypic rescue by re-socialization. *Frontiers in behavioral neuroscience.* 2015,9:102-.
- [37] Willuhn, I., Tose, A., Wanat, M. J., Hart, A. S., Hollon, N. G., Phillips, P. E. M., et al. Phasic dopamine release in the nucleus accumbens in response to pro-social 50 khz ultrasonic vocalizations in rats. *The Journal of Neuroscience.* 2014,34:10616.
- [38] Snoeren, E. M., Ågmo, A. Female ultrasonic vocalizations have no incentive value for male rats. *Behav Neurosci.* 2013,127:439-50.



- [39] Snoeren, E. M., Ågmo, A. The incentive value of males' 50-khz ultrasonic vocalizations for female rats (*rattus norvegicus*). *J Comp Psychol.* 2014,128:40-55.
- [40] Saito, Y., Yuki, S., Seki, Y., Kagawa, H., Okanoya, K. Cognitive bias in rats evoked by ultrasonic vocalizations suggests emotional contagion. *Behavioural processes.* 2016,132:5-11.
- [41] Ågmo, A., Snoeren, E. M. Silent or vocalizing rats copulate in a similar manner. *PLoS One.* 2015,10:e0144164.
- [42] Blumberg, M. S., Alberts, J. R. Ultrasonic vocalizations by rat pups in the cold: An acoustic by-product of laryngeal braking? *Behavioral neuroscience.* 1990,104:808-17.
- [43] Blumberg, M. S., Sokoloff, G. Do infant rats cry? *Psychological Review.* 2001,108:83-95.
- [44] Riede, T., Schaefer, C., Stein, A. Role of deep breaths in ultrasonic vocal production of sprague-dawley rats. *J Neurophysiol.* 2020,123:966-79.
- [45] Sirotin, Y. B., Costa, M. E., Laplagne, D. A. Rodent ultrasonic vocalizations are bound to active sniffing behavior. *Front Behav Neurosci.* 2014,8:399-.
- [46] Riede, T. Rat ultrasonic vocalization shows features of a modular behavior. *J Neurosci.* 2014,34:6874-8.
- [47] Hernandez, C., Sabin, M., Riede, T. Rats concatenate 22 khz and 50 khz calls into a single utterance. *The Journal of experimental biology.* 2017,220:814-21.
- [48] Wright, J. M., Gourdon, J. C., Clarke, P. B. S. Identification of multiple call categories within the rich repertoire of adult rat 50-khz ultrasonic vocalizations: Effects of amphetamine and social context. *Psychopharmacology (Berl).* 2010,211:1-13.
- [49] Takahashi, N., Kashino, M., Hironaka, N. Structure of rat ultrasonic vocalizations and its relevance to behavior. *PLOS ONE.* 2010,5:e14115.
- [50] Ågmo, A., Snoeren, E. M. A cooperative function for multisensory stimuli in the induction of approach behavior of a potential mate. *PLoS One.* 2017,12:e0174339.

[51] Sangiamo, D. T., Warren, M. R., Neunuebel, J. P. Ultrasonic signals associated with different types of social behavior of mice. *Nature neuroscience*. 2020,23:411-22.
